# Supplementary material for: Single cell transcriptomics identifies master regulators of neurodegeneration in SOD1 ALS motor neurons
Source: bioRxiv or medRxiv preprint supplement (doi:10.1101/593129), 2021-03-09

Figure S1

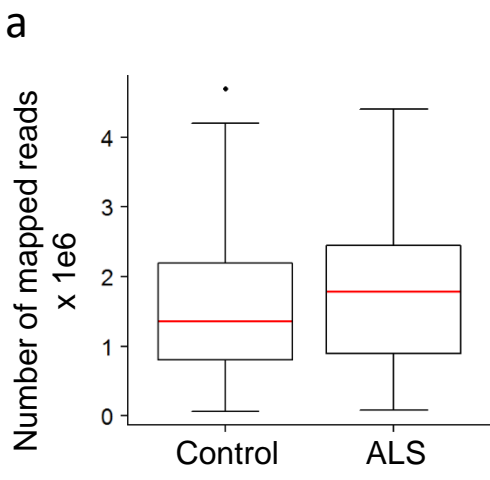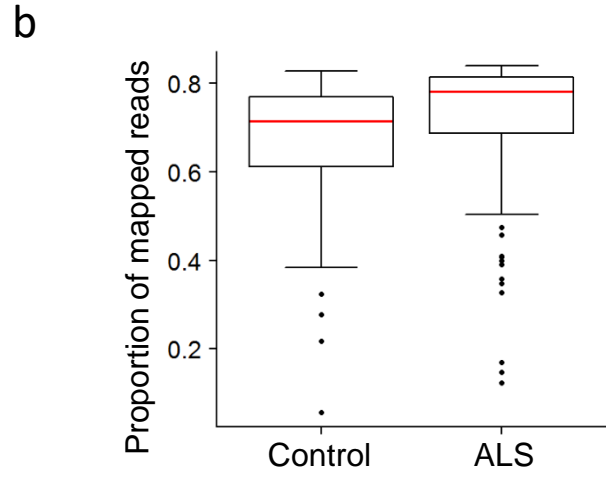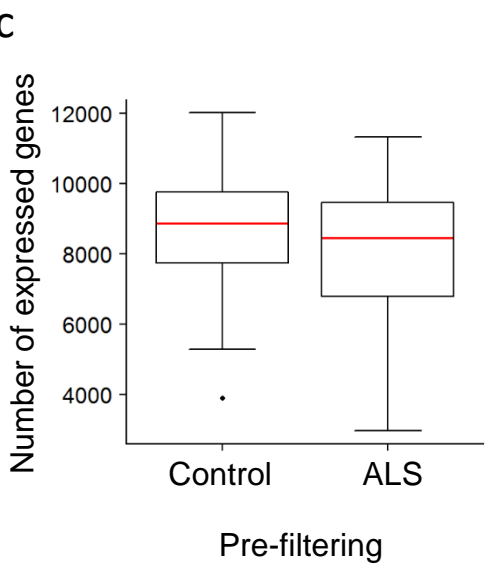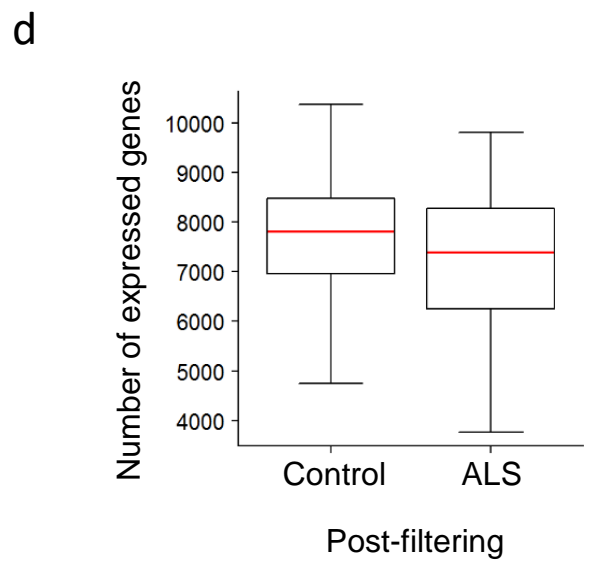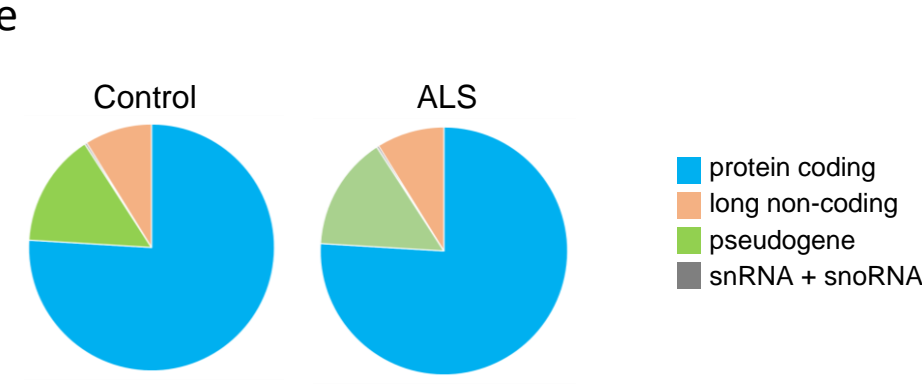

# Figure S2

| GO term (Genes upregulated in neurons)    | FDR      |
|-------------------------------------------|----------|
| Postsynaptic cell membrane                | 8.20E-09 |
| GABAergic synapse                         | 1.10E-05 |
| gamma-aminobutyric acid signaling pathway | 4.70E-04 |
| Voltage-gated channel                     | 7.70E-04 |
| Glutamatergic synapse                     | 1.70E-02 |

| GO term (Genes downregulated in neurons) | FDR      |
|------------------------------------------|----------|
| Cell cycle                               | 3.40E-07 |
| oligodendrocyte differentiation          | 5.40E-04 |

Figure S3

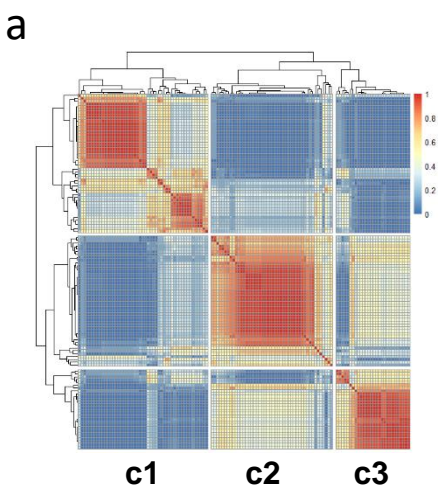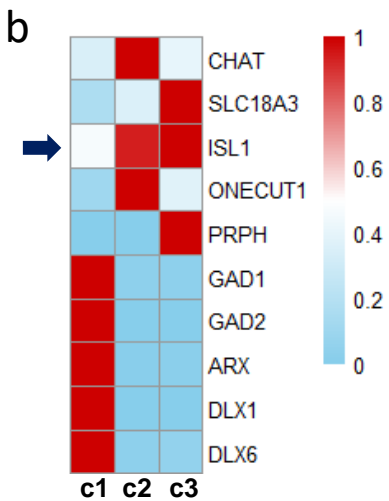

Figure S4

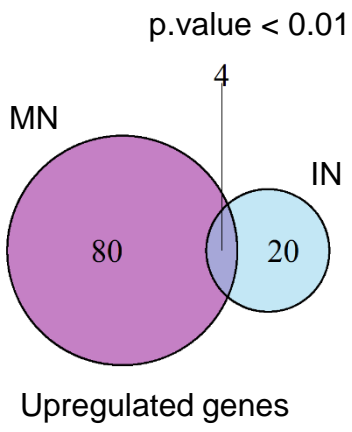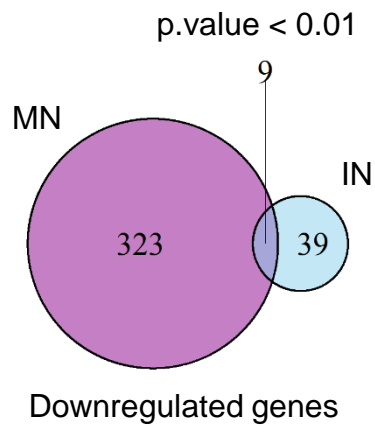

Figure S5

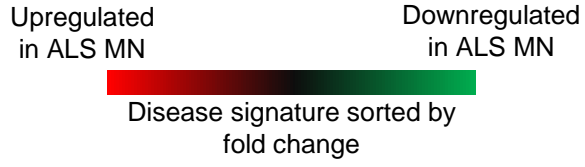

— Target expression  
— TF expression

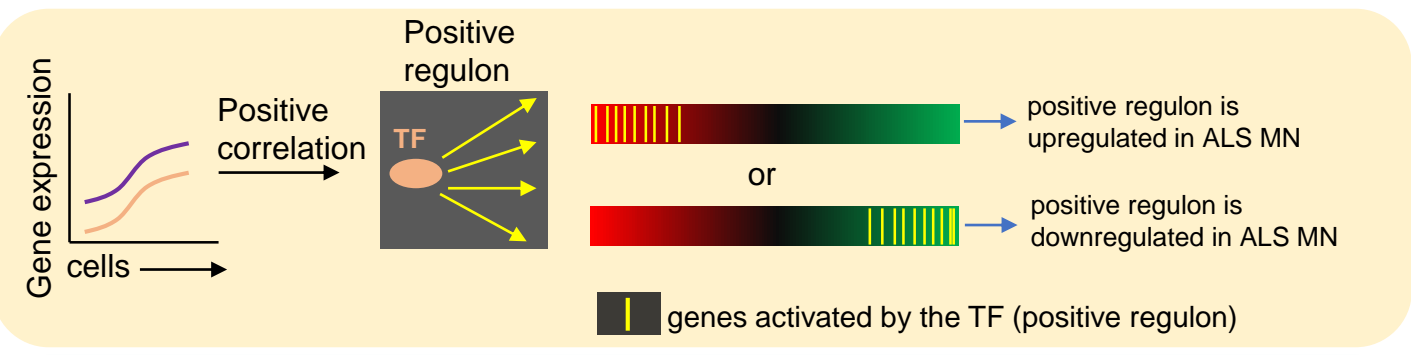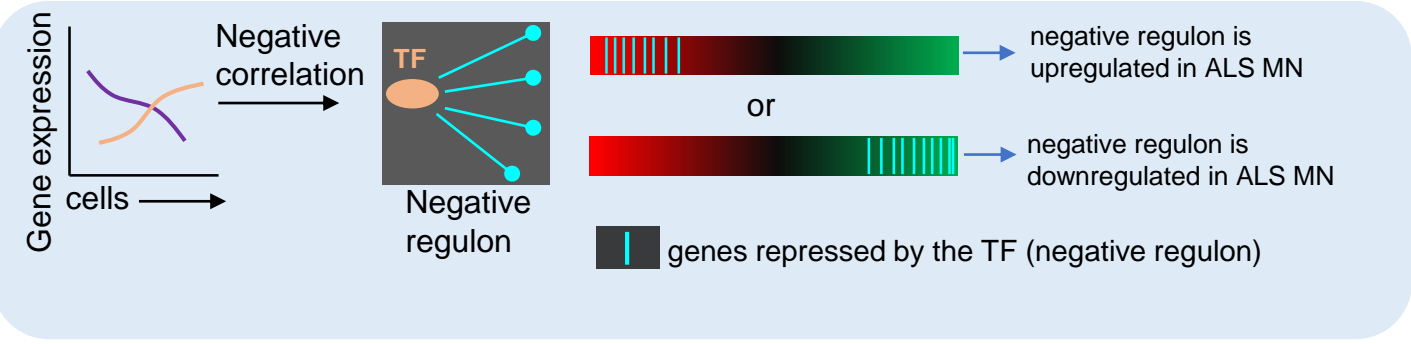

**Filtering master regulators for concordance**

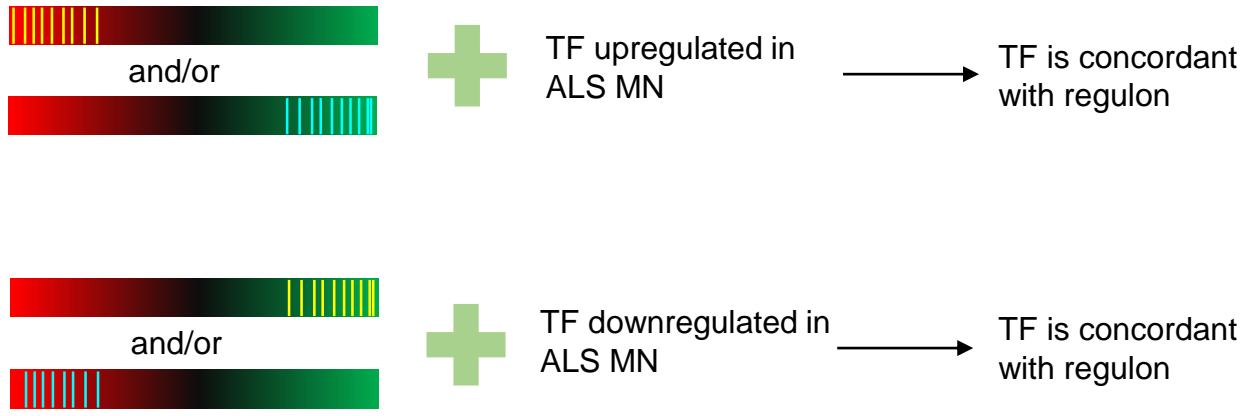

Figure S6

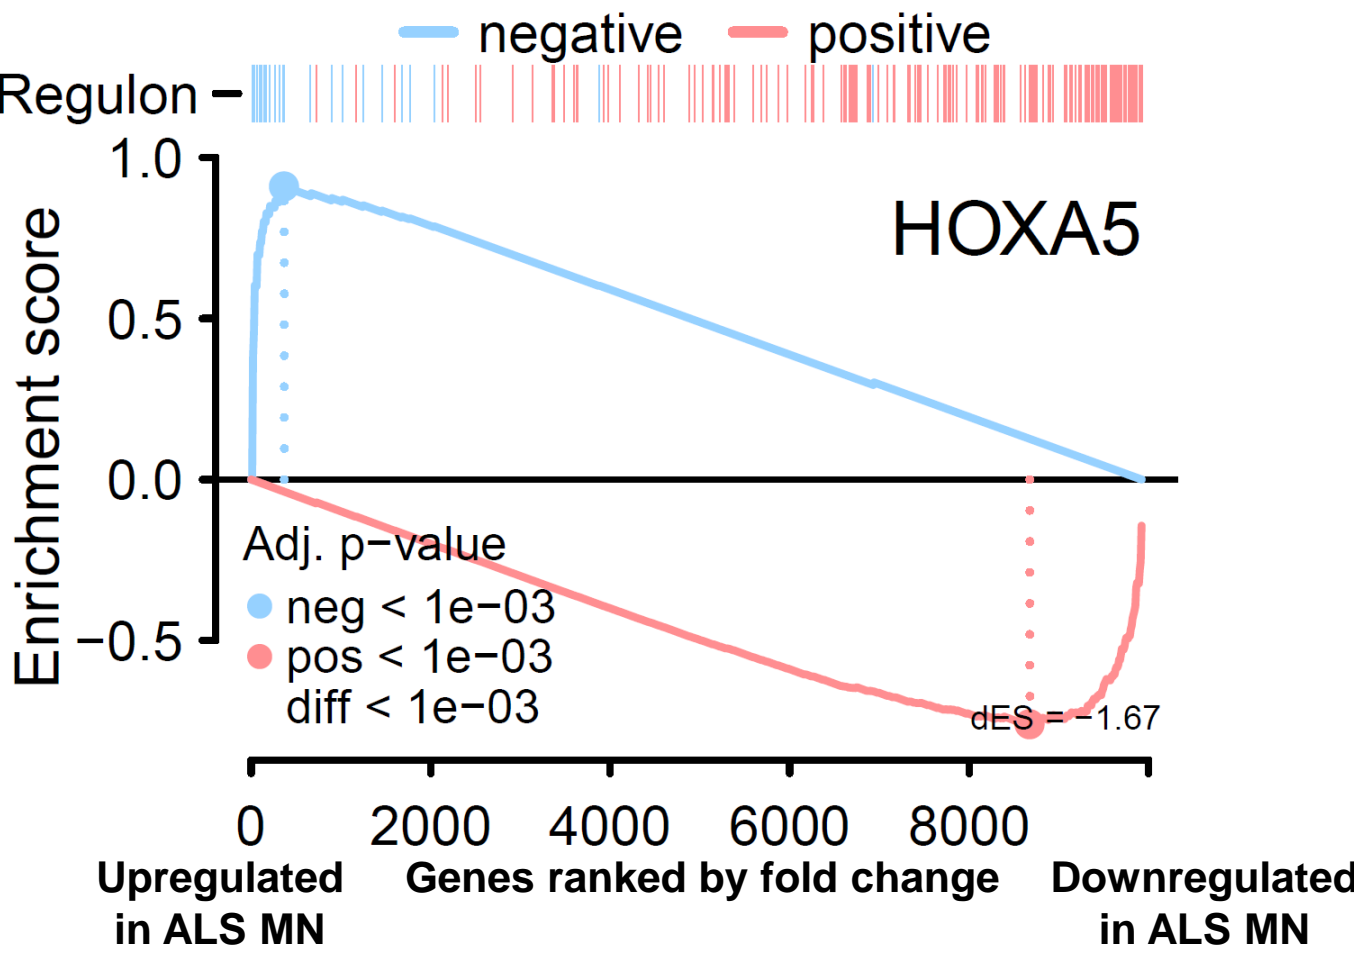

Figure S7

| TF      | Functional category                       | P-value  | FDR      |
|---------|-------------------------------------------|----------|----------|
| HOXA1   | Signalling by NGF (REACTOME)              | 1.76E-05 | 0.050477 |
|         | axon                                      | 0.000199 | 0.05419  |
|         | synapse                                   | 0.00083  | 0.099058 |
| HOXA5   | regulation of actin filament organization | 4.81E-06 | 0.016707 |
|         | adherens junction                         | 1.09E-05 | 0.001891 |
|         | synapse                                   | 7.97E-05 | 0.006592 |
|         | postsynapse                               | 0.000299 | 0.01615  |
| HOXD1   | Membrane Trafficking (REACTOME)           | 3.46E-05 | 0.099584 |
|         | synapse                                   | 2.55E-06 | 0.001591 |
|         | synaptic membrane                         | 3.68E-05 | 0.006993 |
| MAFG    | No significant enrichment                 | -        | -        |
| ATF2    | macroautophagy                            | 1.05E-09 | 8.70E-07 |
|         | Membrane Trafficking (REACTOME)           | 3.70E-08 | 0.000106 |
|         | nucleoside-triphosphatase activity        | 3.40E-07 | 0.00047  |
|         | endosomal transport                       | 5.67E-07 | 0.000256 |
| PRDM2   | mitochondrial envelope                    | 3.66E-07 | 6.77E-05 |
|         | mitochondrial membrane                    | 5.82E-06 | 0.000653 |
| TSC22D2 | No significant enrichment                 | -        | -        |
| ZMIZ1   | No significant enrichment                 | -        | -        |
| ZNF134  | No significant enrichment                 | -        | -        |
| ZBTB6   | mitochondrial envelope                    | 0.000301 | 0.052106 |
|         | mitochondrial membrane                    | 0.00053  | 0.067262 |
| HMGB2   | Cell Cycle, Mitotic (REACTOME)            | 9.59E-05 | 0.068004 |
| HOXD8   | No significant enrichment                 | -        | -        |
| SOX4    | mRNA metabolic process                    | 3.13E-11 | 1.67E-07 |
|         | protein targeting to ER                   | 3.79E-10 | 4.61E-07 |
|         | chromatin organization                    | 1.45E-07 | 4.68E-05 |
|         | positive regulation of cell death         | 0.000235 | 0.023033 |
|         | DNA repair                                | 0.000986 | 0.070476 |

Figure S8

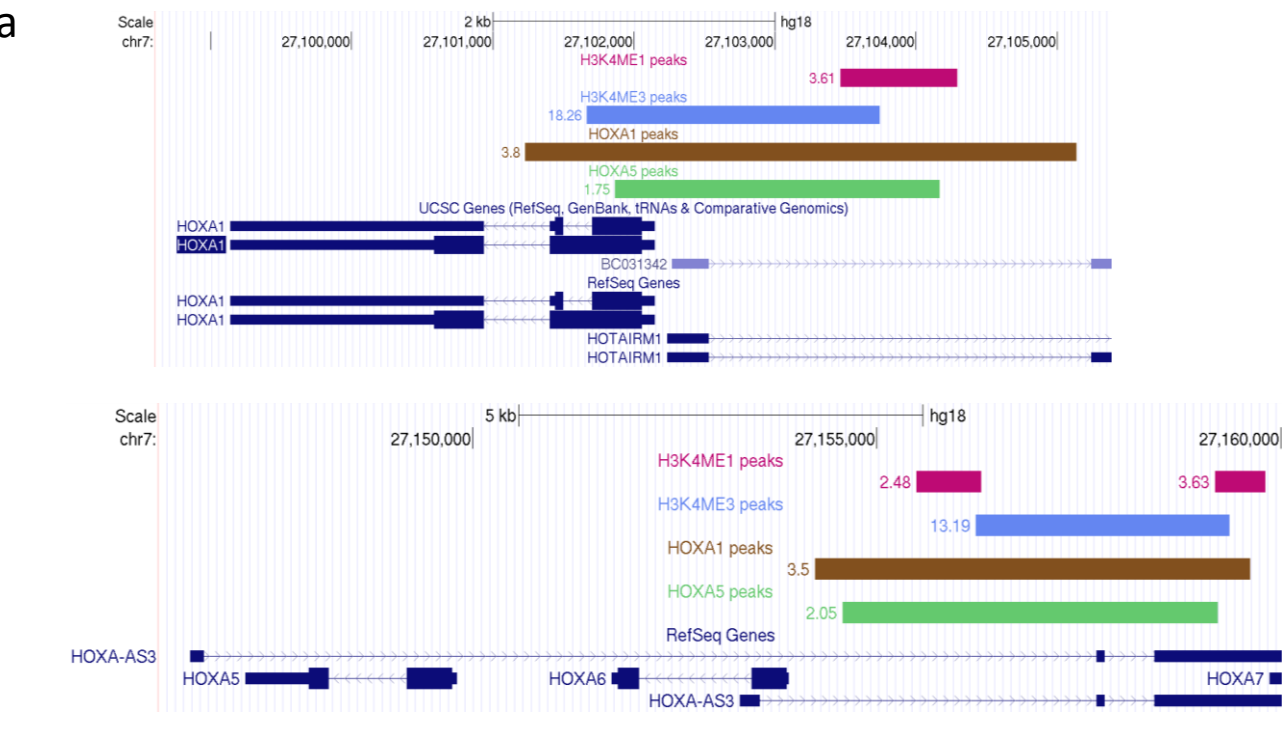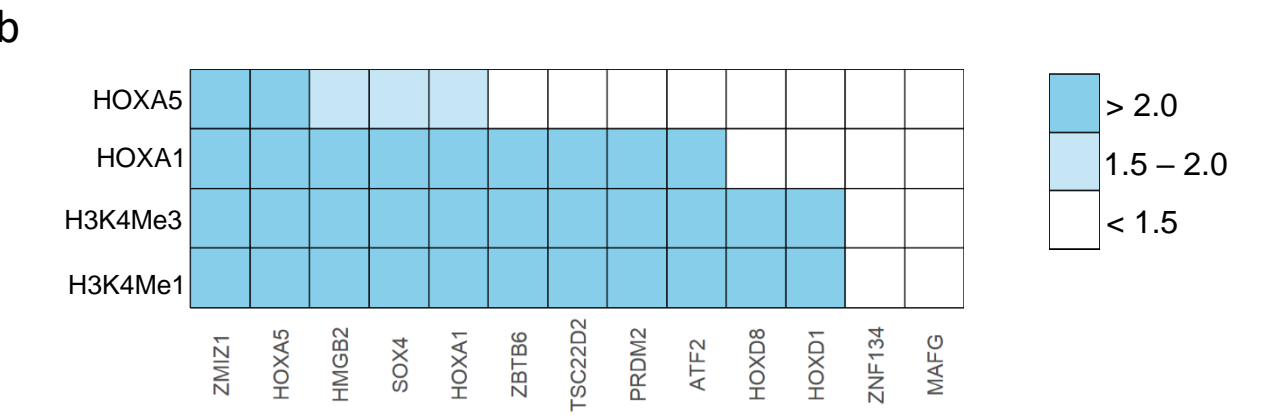

Supplement: Supplementary file [file media-1.pdf]
